# Supplementary material
Source: PubMed Central journal article supplement (PMC3457404)
Supplement: AAC.01247-12_zac999101276so1.pdf [file AAC.01247-12_zac999101276so1.pdf]

Supplemental Table S1. Novel PCR primers used in the study to characterize novel SCC*mec*-SCC elements.

| Gene or region amplified                                                     | Primer pair no. | Primer name                | Nucleotide sequence (5'-3')                   | Nucleotide coordinates                             |
|------------------------------------------------------------------------------|-----------------|----------------------------|-----------------------------------------------|----------------------------------------------------|
| J1 SCC <i>mec</i> IIE to the end of the <i>ccrAB4</i> -carrying element      | 1               | J1_IIE_F3<br>Contig 101 R2 | CAAGTTATCGGATAATGAA<br>GCCAAGCAATTATCATTATG   | 184-166 <sup>a</sup><br>4636-4617 <sup>b</sup>     |
|                                                                              | 2               | Contig 101 F2<br>ccrA4R5   | CCTCGTCTTGAATTTCTTTC<br>CAATATCGTTGAACAATCAC  | 4598-4617 <sup>b</sup><br>7205-7186 <sup>b</sup>   |
|                                                                              | 3               | ccrA4F5<br>M1_R2           | CTTCATTCCTTTTCAGGAGTT<br>AACATGCTTAACGTGAAGTG | 7159-7178 <sup>b</sup><br>9560-9541 <sup>b</sup>   |
|                                                                              | 4               | M1_F2<br>M1_R4             | TAGGAGCACACTTACACAAG<br>CAGCGTATCGTTTATACTG   | 9498-9517 <sup>b</sup><br>13933-13914 <sup>b</sup> |
| J1 SCC <i>mec</i> IVc/IVE to within adjacent <i>ccrAB4</i> -carrying element | 5               | J1_IVc_F2<br>Contig 101 R2 | GACAGTATTCCAACAGTCAA<br>GCCAAGCAATTATCATTATG  | 84-65 <sup>c</sup><br>4636-4617 <sup>b</sup>       |
| J1 SCC <i>mec</i> IVb/IVF to within adjacent <i>ccrAB4</i> -carrying element | 6               | J1_IVb_F2<br>Contig 101 R2 | ACTTAAGTAGTAGCTAACAG<br>GCCAAGCAATTATCATTATG  | 172-153 <sup>d</sup><br>4636-4617 <sup>b</sup>     |
| J1 SCC <i>mec</i> IVg to within adjacent <i>ccrAB4</i> -carrying element     | 7               | J1_IVg_F1<br>Contig 101 R2 | CGTGATAGCGACACAATAC<br>GCCAAGCAATTATCATTATG   | 133-115 <sup>e</sup><br>4636-4617 <sup>b</sup>     |

<sup>a</sup>Nucleotide coordinates based on the nucleotide sequence of SCC*mec* IIE (GenBank accession number AJ810120.1).

<sup>b</sup>Nucleotide coordinates based on the nucleotide sequence of SCC<sub>MI</sub> of AR13.1/3330.2 (HE858191).

<sup>c</sup>Nucleotide coordinates based on the nucleotide sequence of SCC*mec* IVc (AB096217.1).

<sup>d</sup>Nucleotide coordinates based on the nucleotide sequence of from SCC*mec* IVb (AB063173.1).

<sup>e</sup>Nucleotide coordinates based on the nucleotide sequence of SCC*mec* IVg (DQ106887.1).

Supplemental Table S2. The main characteristics of the SCC*mec* types and subtypes investigated during the present study<sup>a</sup>

| SCC <i>mec</i> type | <i>ccr</i> type | <i>mec</i> class | Major characteristics of J regions <sup>b</sup> |                                                                           |                                      | Reference |
|---------------------|-----------------|------------------|-------------------------------------------------|---------------------------------------------------------------------------|--------------------------------------|-----------|
|                     |                 |                  | J1                                              | J2                                                                        | J3                                   |           |
| I                   | 1               | B                | <i>pls</i>                                      | SCC <i>mec</i> I specific J2 region                                       | <i>dcs</i>                           | (1, 4, 6) |
| I – <i>pls</i>      | 1               | B                | Lacks <i>pls</i>                                | ND                                                                        | <i>dcs</i>                           | (6)       |
| Ia                  |                 |                  | <i>pls</i>                                      | SCC <i>mec</i> I specific J2 region                                       | pUB110 ( <i>aadD</i> ) & <i>dcs</i>  | (1, 4)    |
| II                  |                 |                  | <i>kdp</i>                                      | Tn554 ( <i>erm(A)</i> & <i>spc</i> )                                      | pUB110 & <i>dcs</i>                  | (6)       |
| IIA                 | 2               | A.4 <sup>c</sup> | SCC <i>mec</i> IVb specific J1 region           | Tn554                                                                     | pUB110 & <i>dcs</i>                  | (6)       |
| IIB                 | 2               | A                | SCC <i>mec</i> IVb specific J1 region           | Lacks Tn554                                                               | pUB110 & <i>dcs</i>                  | (6)       |
| IIC                 | 2               | A.3 <sup>d</sup> | SCC <i>mec</i> IVb specific J1 region           | Tn554, lacks ORFs between Tn554 & <i>mec</i> complex in SCC <i>mec</i> II | pUB110 & <i>dcs</i>                  | (6)       |
| IID                 | 2               | A.4 <sup>c</sup> | SCC <i>mec</i> IVb specific J1 region           | Tn554                                                                     | <i>dcs</i>                           | (6)       |
| IIE <sup>e</sup>    | 2               | A.3 <sup>d</sup> | SCC <i>mec</i> IVb specific J1 region           | Tn554; lacks ORFs between Tn554 & <i>mec</i> complex                      | <i>dcs</i>                           | (6)       |
| III & SCCHg         | 3               | A                | SCC <i>mec</i> IIIHg-specific J1 region         | ψTn554                                                                    | pT181 ( <i>tet(K)</i> ) & SCCHg with | (1, 5)    |

| SCC <i>mec</i><br>type                  | <i>ccr</i><br>type | <i>mec</i><br>class | Major characteristics of J regions <sup>b</sup> |              |                                                                                                                                                                 | Reference |
|-----------------------------------------|--------------------|---------------------|-------------------------------------------------|--------------|-----------------------------------------------------------------------------------------------------------------------------------------------------------------|-----------|
|                                         |                    |                     | J1                                              | J2           | J3                                                                                                                                                              |           |
| III & SCC<br><i>Hg</i> –<br>p1258/Tn554 | 3                  | A                   | ND                                              | ND           | p1258 ( <i>mer</i> ),<br>Tn554 & <i>ccrC</i><br><br>pT181 &<br>SCC <i>Hg</i> with<br>p1258, Tn554 &<br><i>ccrC</i> but lacking<br>ORFs between<br>p1258 & Tn554 | (6)       |
| IVA                                     | 2                  | B                   | SCC <i>mec</i> IVc-specific J1 region           | No J2 region | pUB110 & <i>dcs</i>                                                                                                                                             | (1)       |
| IVa                                     | 2                  | B                   | SCC <i>mec</i> IVa-specific J1 region           | No J2 region | <i>dcs</i>                                                                                                                                                      | (1, 3)    |
| IVc                                     | 2                  | B                   | SCC <i>mec</i> IVc-specific J1 region           | No J2 region | <i>dcs</i>                                                                                                                                                      | (1)       |
| IVE                                     | 2                  | B                   | SCC <i>mec</i> IVc-specific J1 region           | ND           | Lacks <i>dcs</i>                                                                                                                                                | (6)       |
| IVF                                     | 2                  | B                   | SCC <i>mec</i> IVb-specific J1 region           | ND           | Lacks <i>dcs</i>                                                                                                                                                | (6)       |
| IVg                                     | 2                  | B                   | SCC <i>mec</i> IVg-specific J1 region           | No J2 region | <i>dcs</i>                                                                                                                                                      | (1, 2)    |

<sup>a</sup> This table was adapted from the Guidelines on the Classification of SCC*mec* elements (1). For the main characteristics of additional SCC*mec* types and subtypes not investigated in the present study see reference (1) or [http://www.sccmec.org/Pages/SCC\\_HomeEN.html](http://www.sccmec.org/Pages/SCC_HomeEN.html).

<sup>b</sup> The antimicrobial resistance genes carried on plasmids and transposons integrated within the SCC*mec* elements are written in parenthesis after the first time the relevant plasmid or transposon name is listed.

<sup>c</sup> class A.4 *mec* complex differs from class A *mec* due to the presence of IS1182 within *mecI* (6).

<sup>d</sup> class A.3 *mec* complex differs from class A *mec* due to the presence of IS1182 within *mecI* and deletion of the 3' end of *mec* regulatory gene *mecI* (6).

ND, not determined.

## REFERENES

- (1) **International Working Group on the Classification of Staphylococcal Cassette Chromosome Elements (IWG-SCC).** 2009. Classification of staphylococcal cassette chromosome *mec* (SCC*mec*): guidelines for reporting novel SCC*mec* elements. Antimicrob. Agents Chemother. **53**:4961-4967.
- (2) **Kwon, N. H., K. T. Park, J. S. Moon, W. K. Jung, S. H. Kim, J. M. Kim, S. K. Hong, H. C. Koo, Y. S. Joo, and Y. H. Park.** 2005. Staphylococcal cassette chromosome *mec* (SCC*mec*) characterization and molecular analysis for methicillin-resistant *Staphylococcus aureus* and novel SCC*mec* subtype IVg isolated from bovine milk in Korea. J. Antimicrob. Chemother. **56**:624-632.
- (3) **Ma, X. X., T. Ito, C. Tiensasitorn, M. Jamklang, P. Chongtrakool, S. Boyle-Vavra, R. S. Daum, and K. Hiramatsu.** 2002. Novel type of staphylococcal cassette chromosome *mec* identified in community-acquired methicillin-resistant *Staphylococcus aureus* strains. Antimicrob. Agents Chemother. **46**:1147-1152.
- (4) **Oliveira, D. C., A. Tomasz, and H. de Lencastre.** 2001. The evolution of pandemic clones of methicillin-resistant *Staphylococcus aureus*: identification of two ancestral genetic backgrounds and the associated *mec* elements. Microb. Drug Resist. **7**:349-361.

- (5) **Oliveira, D. C., and H. de Lencastre.** 2002. Multiplex PCR strategy for rapid identification of structural types and variants of the *mec* element in methicillin-resistant *Staphylococcus aureus*. *Antimicrob. Agents Chemother.* **46**:2155-2161.
- (6) **Shore, A., A. S. Rossney, C. T. Keane, M. C. Enright, and D. C. Coleman.** 2005. Seven novel variants of the staphylococcal chromosomal cassette *mec* in methicillin-resistant *Staphylococcus aureus* isolates from Ireland. *Antimicrob. Agents Chemother.* **49**:2070-2083.
